# Supplementary material for: Reconstitution of the SARS-CoV-2 ribonucleosome provides insights into genomic RNA packaging and regulation by phosphorylation
Source: PubMed Central journal article supplement — bioRxiv. 2022 May 24:2022.05.23.493138. Preprint. [Version 1] doi: 10.1101/2022.05.23.493138 (PMC9164447; doi:10.1101/2022.05.23.493138), 2022-05-24
Supplement: NIHPP2022.05.23.493138V1-supplement-1.pdf [file NIHPP2022.05.23.493138V1-supplement-1.pdf]

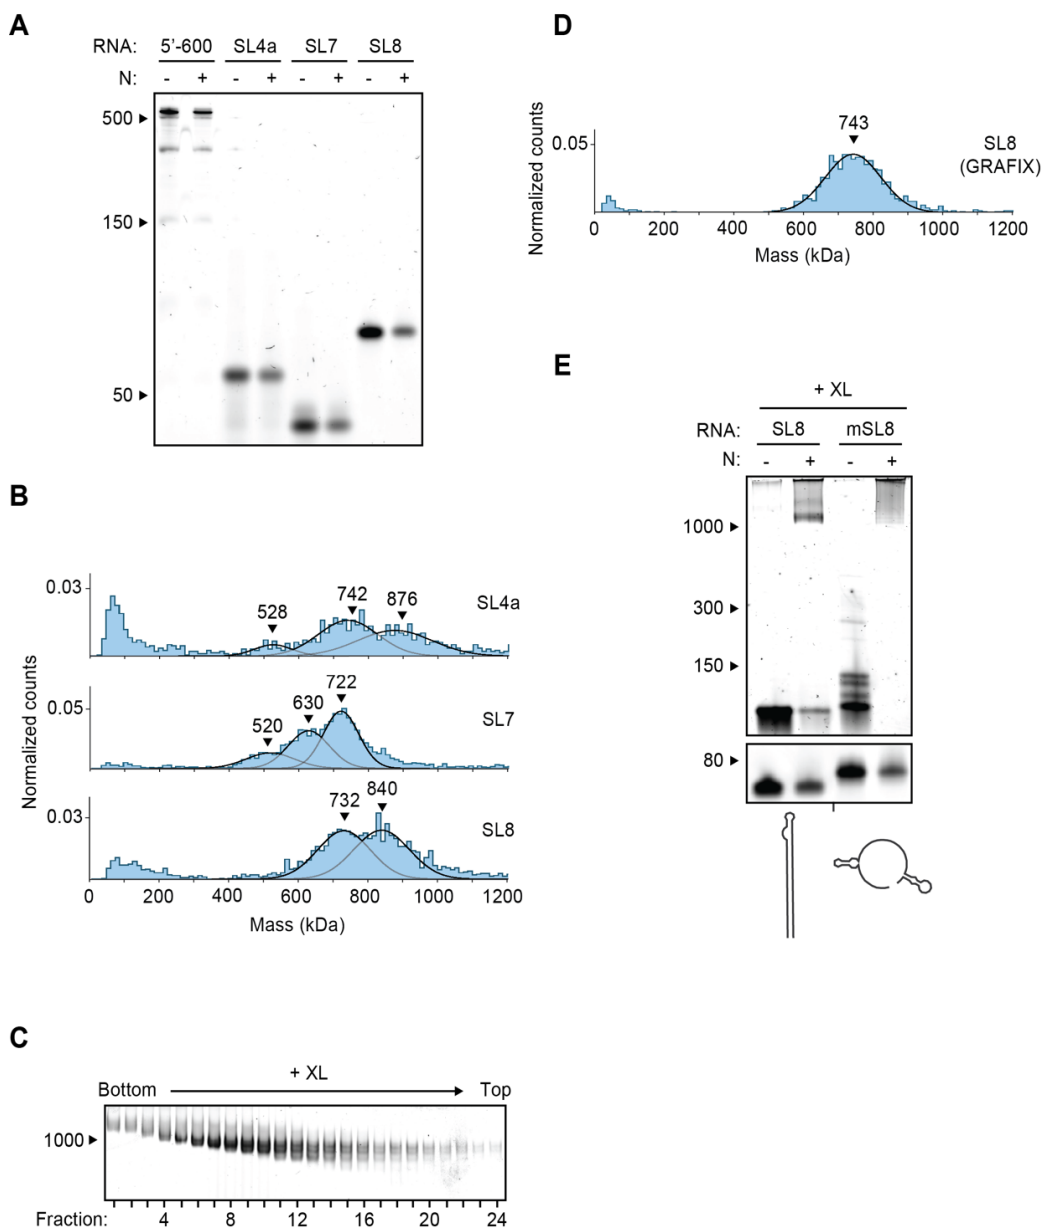

**Fig S1. vRNP formation with stem-loop RNAs.** (A) Denaturing gel electrophoresis of N protein mixed with indicated RNAs, related to Fig 2b. (B) Mass photometry analyses of crosslinked N protein complexes with indicated RNAs. Results with SL8 are reproduced in Fig. 2D. Representative of two independent experiments (table S1). (C) N protein in complex with SL8 RNA was separated by glycerol gradient centrifugation in the presence of crosslinker (GraFix) and analyzed by native gel electrophoresis. (D) Fractions 7 and 8 of GraFix-purified N-SL8 vRNPs (from C) were combined and analyzed by mass photometry. Representative of two independent experiments (table S1). (E) N protein was combined with SL8 RNA or mutant SL8 RNA (mSL8), crosslinked, and analyzed by native (top) and denaturing (bottom) gel electrophoresis. Predicted secondary structures are shown below. See table S2 for sequences.

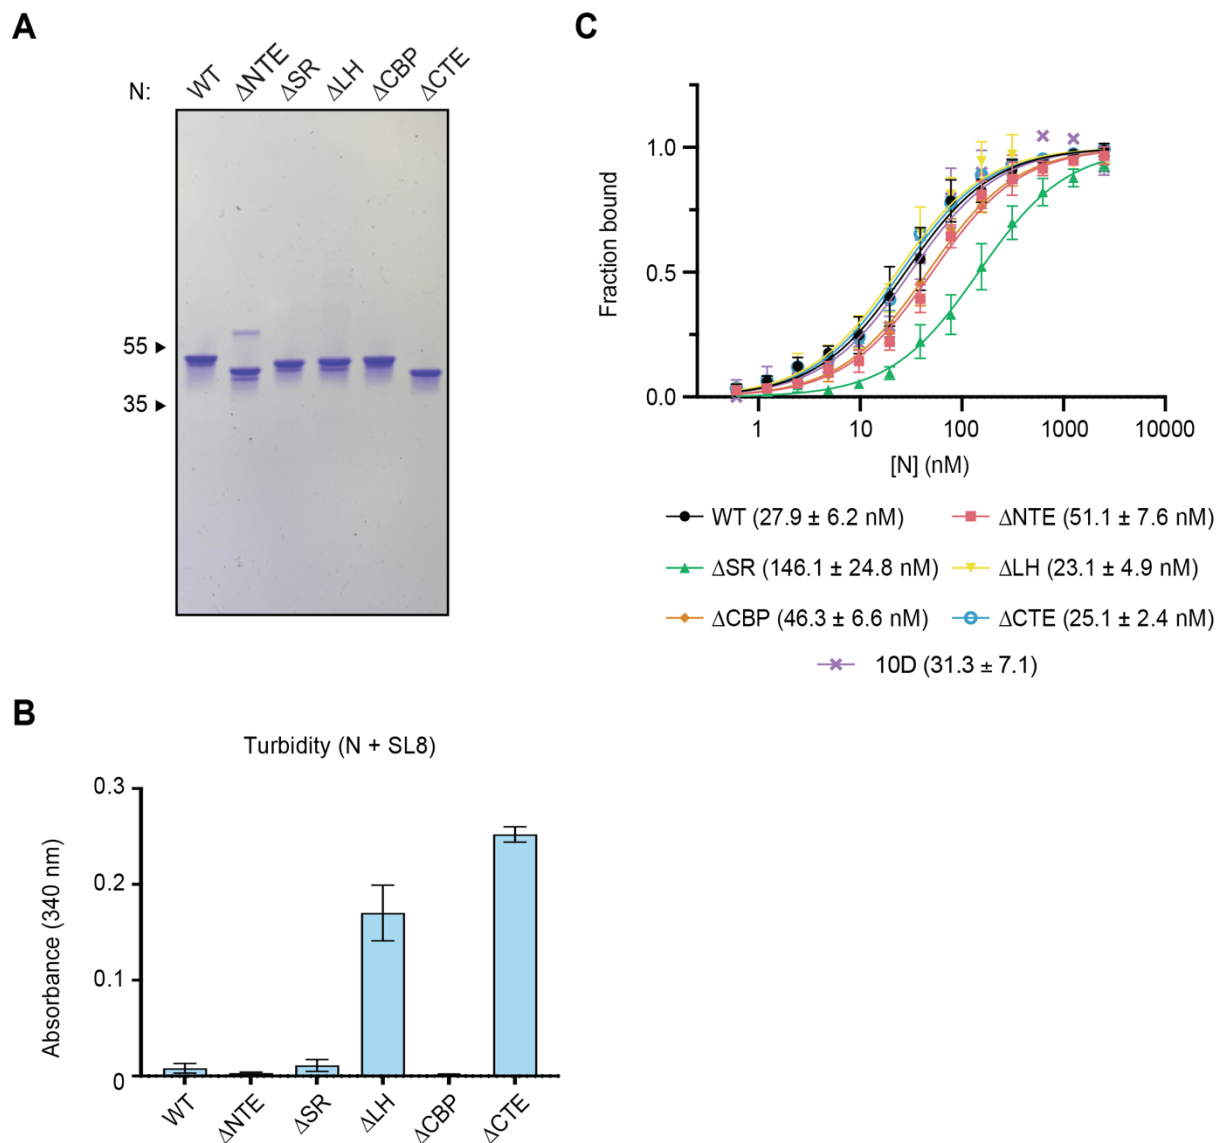

**Fig S2. Analysis of N protein deletion mutants.** (A) SDS-PAGE of N protein constructs used in this study, stained with Coomassie Blue. Molecular weight markers at left (kDa). (B) Absorbance at 340 nm was used to quantify the turbidity of wild-type and mutant N proteins mixed with SL8 RNA. All values are normalized to absorbance at 260 nm. (C) The indicated concentrations of N protein were incubated with 10 nM RNA (an entirely degenerate 10-nt RNA oligo with a 3'-FAM modification) and fluorescence anisotropy was measured. Data points reflect mean  $\pm$  SEM of three independent experiments.  $K_D$  of each mutant is shown below.

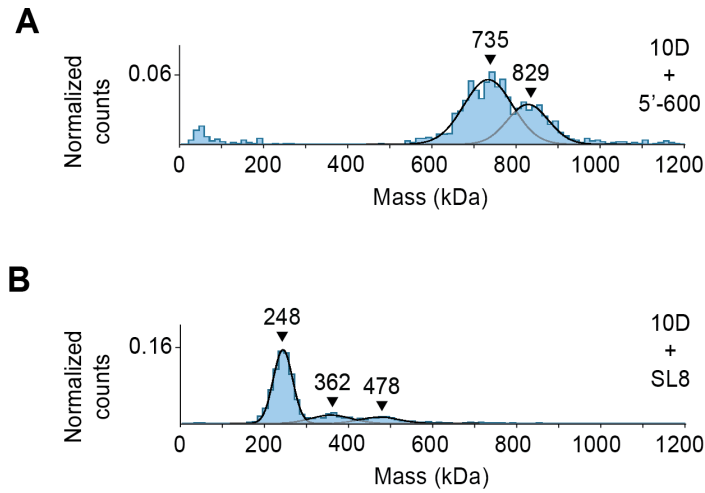

**Fig S3. Analysis of complex formation by 10D mutant.** Mass photometry analysis of GraFix-purified **(A)** fractions 7 + 8 of N protein in complex with 5'-600 RNA and **(B)** fractions 19 + 20 of N protein in complex with SL8 RNA. Representative of two independent experiments (table S1).

**Table S1. Summary of mass photometry results (kDa).**

| Figure 1  |       |       |             |       |       |            |       |       |                |
|-----------|-------|-------|-------------|-------|-------|------------|-------|-------|----------------|
| Figure 1C |       |       |             |       |       |            |       |       |                |
| 5'-400    |       |       | 5'-600      |       |       | 5'-800     |       |       |                |
| peak      | rep 1 | rep 2 | mean ± SD   | rep 1 | rep 2 | mean ± SD  | rep 1 | rep 2 | mean ± SD      |
| 1         | 630   | 631   | 630.5 ± 0.7 | 802   | 853   | 827.5 ± 36 | 756   | 721   | 738.5 ± 24.7   |
| 2         | 739   | 728   | 733.5 ± 7.8 |       |       |            | 1418  | 1613  | 1515.5 ± 137.9 |

  

| Figure 1E |       |       |             |       |       |           |
|-----------|-------|-------|-------------|-------|-------|-----------|
| -XL       |       |       | +XL         |       |       |           |
| peak      | rep 1 | rep 2 | mean ± SD   | rep 1 | rep 2 | mean ± SD |
| 1         | 95    | 98    | 96.5 ± 2.2  | 724   | 714   | 719 ± 7.1 |
| 2         | 202   | 211   | 206.5 ± 6.4 |       |       |           |
| 3         | 761   | 770   | 765.5 ± 6.4 |       |       |           |

  

| Figure 2   |       |       |            |       |       |                           |       |       |       |              |
|------------|-------|-------|------------|-------|-------|---------------------------|-------|-------|-------|--------------|
| Figure 2D  |       |       |            |       |       |                           |       |       |       |              |
| -SL8 / -XL |       |       | +SL8 / -XL |       |       | +SL8 / +XL (from Fig S1B) |       |       |       |              |
| peak       | rep 1 | rep 2 | mean ± SD  | rep 1 | rep 2 | mean ± SD                 | rep 1 | rep 2 | rep 3 | mean ± SD    |
| 1          | 96    | 98    | 97 ± 1.4   | 110   | 105   | 107.5 ± 3.5               | 732   | 728   | 749   | 736.5 ± 11.2 |
| 2          | 196   | 202   | 199 ± 4.2  | 232   | 218   | 225 ± 9.9                 | 840   | 829   | 852   | 840.3 ± 11.5 |
| 3          |       |       |            | 361   | 358   | 359.5 ± 2.1               |       |       |       |              |
| 4          |       |       |            | 487   | 448   | 467.5 ± 27.6              |       |       |       |              |
| 5          |       |       |            | 622   | 578   | 600 ± 31.1                |       |       |       |              |
| 6          |       |       |            | 755   | 717   | 736 ± 26.9                |       |       |       |              |

  

| Figure 3          |       |       |       |              |       |       |              |       |       |              |
|-------------------|-------|-------|-------|--------------|-------|-------|--------------|-------|-------|--------------|
| Figure 3D         |       |       |       |              |       |       |              |       |       |              |
| WT (from Fig S1B) |       |       |       | ΔNTE         |       |       | ΔSR          |       |       |              |
| peak              | rep 1 | rep 2 | rep 3 | mean ± SD    | rep 1 | rep 2 | mean ± SD    | rep 1 | rep 2 | mean ± SD    |
| 1                 | 732   | 728   | 749   | 736.5 ± 11.2 | 701   | 702   | 701.5 ± 1    | 236   | 224   | 230 ± 8.5    |
| 2                 | 840   | 829   | 852   | 840.3 ± 11.5 | 775   | 804   | 789.5 ± 20.5 | 357   | 324   | 340.5 ± 23.3 |
| 3                 |       |       |       |              |       |       |              | 472   | 432   | 452 ± 28.3   |
| 4                 |       |       |       |              |       |       |              | 589   | 552   | 570.5 ± 26.2 |
| 5                 |       |       |       |              |       |       |              | 706   | 689   | 697.5 ± 12   |
| 6                 |       |       |       |              |       |       |              | 844   | 831   | 837.5 ± 9.2  |

  

| Figure 3D (continued) |       |       |             |       |       |              |       |       |           |
|-----------------------|-------|-------|-------------|-------|-------|--------------|-------|-------|-----------|
| ΔLH                   |       |       | ΔCBP        |       |       | ΔCTE         |       |       |           |
| peak                  | rep 1 | rep 2 | mean ± SD   | rep 1 | rep 2 | mean ± SD    | rep 1 | rep 2 | mean ± SD |
| 1                     | 100   | 113   | 106.5 ± 9.2 | 92    | 107   | 99.5 ± 10.6  | n/a   | n/a   | n/a       |
| 2                     | 214   | 230   | 222 ± 11.3  | 200   | 215   | 207.5 ± 10.6 |       |       |           |
| 3                     | 335   | 345   | 340 ± 7.1   | 303   | 332   | 317.5 ± 20.5 |       |       |           |
| 4                     |       |       |             | 428   | 436   | 432 ± 5.7    |       |       |           |
| 5                     |       |       |             | 562   | 568   | 565 ± 4.2    |       |       |           |
| 6                     |       |       |             |       |       |              |       |       |           |

  

| Figure 4          |       |       |       |                  |       |       |              |       |       |              |
|-------------------|-------|-------|-------|------------------|-------|-------|--------------|-------|-------|--------------|
| Figure 4D         |       |       |       |                  |       |       |              |       |       |              |
| WT (from Fig S1B) |       |       |       | ΔSR (from fig 3) |       |       | 10D          |       |       |              |
| peak              | rep 1 | rep 2 | rep 3 | mean ± SD        | rep 1 | rep 2 | mean ± SD    | rep 1 | rep 2 | mean ± SD    |
| 1                 | 732   | 728   | 749   | 736.5 ± 11.2     | 236   | 224   | 230 ± 8.5    | 231   | 230   | 230.5 ± 0.7  |
| 2                 | 840   | 829   | 852   | 840.3 ± 11.5     | 357   | 324   | 340.5 ± 23.3 | 346   | 348   | 347 ± 1.4    |
| 3                 |       |       |       |                  | 472   | 432   | 452 ± 28.3   | 456   | 452   | 454 ± 2.8    |
| 4                 |       |       |       |                  | 589   | 552   | 570.5 ± 26.2 | 569   | 540   | 554.5 ± 20.5 |
| 5                 |       |       |       |                  | 706   | 689   | 697.5 ± 12   |       |       |              |
| 6                 |       |       |       |                  | 844   | 831   | 837.5 ± 9.2  |       |       |              |

  

| Figure 5      |       |       |                          |       |       |           |
|---------------|-------|-------|--------------------------|-------|-------|-----------|
| Figure 5D     |       |       |                          |       |       |           |
| WT (+kinases) |       |       | S188A + S206A (+kinases) |       |       |           |
| peak          | rep 1 | rep 2 | mean ± SD                | rep 1 | rep 2 | mean ± SD |
| 1             | 235   | 207   | 221 ± 19.8               | 736   | 730   | 733 ± 4.2 |
| 2             | 335   | 308   | 321.5 ± 19.1             |       |       |           |
| 3             | 445   | 447   | 446 ± 1.4                |       |       |           |

  

| Figure S1  |       |       |              |       |       |              |       |       |       |              |
|------------|-------|-------|--------------|-------|-------|--------------|-------|-------|-------|--------------|
| Figure S1B |       |       |              |       |       |              |       |       |       |              |
| SL4a       |       |       | SL7          |       |       | SL8          |       |       |       |              |
| peak       | rep 1 | rep 2 | mean ± SD    | rep 1 | rep 2 | mean ± SD    | rep 1 | rep 2 | rep 3 | mean ± SD    |
| 1          | 528   | 501   | 514.5 ± 19.1 | 520   | 484   | 502 ± 25.5   | 732   | 728   | 749   | 736.5 ± 11.2 |
| 2          | 742   | 735   | 738.5 ± 4.9  | 630   | 599   | 614.5 ± 21.9 | 840   | 829   | 852   | 840.3 ± 11.5 |
| 3          | 876   | 875   | 875.5 ± 0.7  | 722   | 703   | 712.5 ± 13.4 |       |       |       |              |

  

| Figure S1D   |       |       |             |
|--------------|-------|-------|-------------|
| SL8 (GRAFIX) |       |       |             |
| peak         | rep 1 | rep 2 | mean ± SD   |
| 1            | 743   | 736   | 739.5 ± 4.9 |

  

| Figure S3             |       |       |           |
|-----------------------|-------|-------|-----------|
| Figure S3A            |       |       |           |
| 10D + 5'-600 (GRAFIX) |       |       |           |
| peak                  | rep 1 | rep 2 | mean ± SD |
| 1                     | 735   | 725   | 730 ± 7.1 |
| 2                     | 829   | 817   | 823 ± 8.5 |

  

| Figure S3B         |       |       |             |
|--------------------|-------|-------|-------------|
| 10D + SL8 (GRAFIX) |       |       |             |
| peak               | rep 1 | rep 2 | mean ± SD   |
| 1                  | 248   | 249   | 248.5 ± 0.7 |
| 2                  | 362   | 367   | 364.5 ± 3.5 |
| 3                  | 478   | 487   | 482.5 ± 6.4 |

**Table S2. RNA sequences used in this study.**

|        |                                                                                                                                                                                                                                                                                                                                                                                                                                                                                                                                                                                                                                                                                                                                                                                                                                                                                                                                                                                                                                                                                                                                                                                                                      |
|--------|----------------------------------------------------------------------------------------------------------------------------------------------------------------------------------------------------------------------------------------------------------------------------------------------------------------------------------------------------------------------------------------------------------------------------------------------------------------------------------------------------------------------------------------------------------------------------------------------------------------------------------------------------------------------------------------------------------------------------------------------------------------------------------------------------------------------------------------------------------------------------------------------------------------------------------------------------------------------------------------------------------------------------------------------------------------------------------------------------------------------------------------------------------------------------------------------------------------------|
| 5'-400 | <p>                     auuaaagguuuauaccuucccagguaacaaaccaaccaacuucgaucucuuguagaucug<br/>                     uucucuaaacgaacuuuaaaaucuguguggcugucacucggcugcaugcuuagugcacucac<br/>                     gcaguauaauuaaauaacuaauuacugucguugacaggacacgaguaacucgucuaucuuuc<br/>                     gcaggcugcuuacgguuucguccguguugcagccgaucaucagcacaucuaagguuucguccg<br/>                     ggugugaccgaaagguaaagauggagagccuugucccugguuucaacgagaaaacacacguc<br/>                     caacucaguuugccuguuuuacagguucgagcugcugcguacguggcuuuggagacuccgu<br/>                     ggaggaggucuuauacagaggcacgucaacu                 </p>                                                                                                                                                                                                                                                                                                                                                                                                                                                                                                                                                                                           |
| 5'-600 | <p>                     auuaaagguuuauaccuucccagguaacaaaccaaccaacuucgaucucuuguagaucug<br/>                     uucucuaaacgaacuuuaaaaucuguguggcugucacucggcugcaugcuuagugcacucac<br/>                     gcaguauaauuaaauaacuaauuacugucguugacaggacacgaguaacucgucuaucuuuc<br/>                     gcaggcugcuuacgguuucguccguguugcagccgaucaucagcacaucuaagguuucguccg<br/>                     ggugugaccgaaagguaaagauggagagccuugucccugguuucaacgagaaaacacacguc<br/>                     caacucaguuugccuguuuuacagguucgagcugcugcguacguggcuuuggagacuccgu<br/>                     ggaggaggucuuauacagaggcacgucaacuuaaagauggcacuuguggcuuaguagaa<br/>                     guugaaaaaggcguuuugccucaacuugaacagcccuauguguucaucaaacguucggau<br/>                     cucgaacugcaccucauggucauguuauugguugagcugguagcagaacucgaaggcauuc<br/>                     guacggucguaguggugagacacuugguguccuuguccucauguggg                 </p>                                                                                                                                                                                                                                                                                                         |
| 5'-800 | <p>                     auuaaagguuuauaccuucccagguaacaaaccaaccaacuucgaucucuuguagaucug<br/>                     uucucuaaacgaacuuuaaaaucuguguggcugucacucggcugcaugcuuagugcacucac<br/>                     gcaguauaauuaaauaacuaauuacugucguugacaggacacgaguaacucgucuaucuuuc<br/>                     gcaggcugcuuacgguuucguccguguugcagccgaucaucagcacaucuaagguuucguccg<br/>                     ggugugaccgaaagguaaagauggagagccuugucccugguuucaacgagaaaacacacguc<br/>                     caacucaguuugccuguuuuacagguucgagcugcugcguacguggcuuuggagacuccgu<br/>                     ggaggaggucuuauacagaggcacgucaacuuaaagauggcacuuguggcuuaguagaa<br/>                     guugaaaaaggcguuuugccucaacuugaacagcccuauguguucaucaaacguucggau<br/>                     cucgaacugcaccucauggucauguuauugguugagcugguagcagaacucgaaggcauuc<br/>                     guacggucguaguggugagacacuugguguccuuguccucaugugggcaauaccagug<br/>                     gcuuaccgcaagguucuuucguuagaacgguaauaaaggagcugguggcauaguuaacg<br/>                     gcgccgaucuaaagucuuugacuuaggcagcagcugcugcugaucuuuugaaguuuu<br/>                     ucaagaaaacuggaacacuaaacaauagcagugguguuacccgugaacucaugcugagcuu<br/>                     aacg                 </p> |
| Nsp3   | <p>                     uuaugaaagacauucucucucucuuuuuguuuacuuagacaaccugagagcuaauaacacu<br/>                     aaagguucauugccuauuaauguuauaguuuuuugaugguaaaucuaaaaugugaagaauca<br/>                     ucugcaaaaucagcugcuguuuacuacagucagcuuauugugucaaccuauacuguuacuag<br/>                     aucaggcauuagugucugauguuggugauagugcgggaaguugcaguuaaaauguuugauc<br/>                     uuacguuaauacguuuuaucauacuuuuacguaccaauaggaaaaacuaaaacacuaguu<br/>                     gcaacugcagaagcugaacuugcaagaauuguccuuaagacaauugcuuauacuacuuuu<br/>                     uuucagcagcucggcaaggguuugauucagauagaaacuaaagauguuuguugaug<br/>                     ucuuaaaauugucacaucauacugacauagaaguuaucuggcgauaguuguaauaacuauaug<br/>                     cucaccuuaaacaaguuugaaaacaugacaccccugaccuuggugcuuguauugacugua<br/>                     gugcgcgucuuuuauugcgcagguagcaaaaagucacaacauugcuuugau                 </p>                                                                                                                                                                                                                                                                                                          |

|        |                                                                                                                                                                                                                                                                                                                                                                                                                                                                                                                                                                                                                                                                 |
|--------|-----------------------------------------------------------------------------------------------------------------------------------------------------------------------------------------------------------------------------------------------------------------------------------------------------------------------------------------------------------------------------------------------------------------------------------------------------------------------------------------------------------------------------------------------------------------------------------------------------------------------------------------------------------------|
| Nsp8/9 | gccaugcaacguaaguuggaaaagauggcugaucaagcuauagacccaaauguauaaacagg<br>cuagaucugaggacaagagggcaaaaguacuagugcuauagcagacaauugcuuuucacuau<br>gcuuagaaaaguuggauaaugaugcacucaacaacauuaucaacaauugcaagagaugguugu<br>guucccuugaacauaaauaccucuuaacaacagcagccaaacuaaugguugucacuaccagacua<br>uaacacauauaaaaauacgugugaugguacaacauuuacuuaugcaucagcauugugggaa<br>auccaacagguuguagauagcagauaguaaaaauugucaacuagugaaaauaguaggaca<br>auucaccuaauuuagcauggccucuuauguaacagcuuaagggccaaauucugcugucua<br>auuacagaauaaugagcuuaguccuguugcacuacgacagaugucuugugcugccgguacu<br>acacaaacugcuugcacugaugacaauugcguuagcuuacuacaacaacaagggaggua<br>gguuuguacuugcacuguuauccgauuuacaggauuugaaaugggcuaga |
| Nsp10  | ggaagccaauauggaucaagaauccuuugguggugcaucguguugucuguacugccguugc<br>cacauagaucauccaaauccuaaaggauuuugugacuuaaaagguaaguauguacaaaauac<br>cuacaacuugugcuauaugacccugugguuuuacacuuaaaaacacagucuguaccgucugc<br>gguauguggaaagguuauggcuguaguugugaucaacuaccggaacccaugcuucagucag<br>cugaugcacaaucguuuuuaaacgguuugcgguguaagugcagcccgucuuacaccgugc<br>ggcacaggcacuaguacugaugucguauacagggcuuuugacaucuacaaugauaaaaguag<br>cugguuuugcuaaaauccuaaaaaacuaauuguugucgcuuccaagaaaaggacgaagauga<br>caauuuauuugauucuuacuauuaguuaagagacacacuuucucuaacuaccaacaugaa<br>gaaacaauuuauuuuuacuuaaggauuuguccagcuguugcuuaacaugacuucuuuagu<br>uuagaauagacggugacaugguaccacauauaucacgucaacgucuuacu    |
| SL4a   | uuaaaaucuguguggcugucacucggcugcaugcuuagugcacucacgcaguauaa                                                                                                                                                                                                                                                                                                                                                                                                                                                                                                                                                                                                        |
| SL7    | acguggcuuuggagacuccguggaggaggucuuaucaagaggcacgu                                                                                                                                                                                                                                                                                                                                                                                                                                                                                                                                                                                                                 |
| SL8    | gauggcacuuguggcuuaguagaaguugaaaaaggcguuuugccucaacuugaacagcccu<br>auguguuacuc                                                                                                                                                                                                                                                                                                                                                                                                                                                                                                                                                                                    |
| mSL8   | gauAgcaAuuguAAcuuaguagUCACGgaaaaagUcguuuugccucaacuugaacagc<br>ccuauAugAucauc                                                                                                                                                                                                                                                                                                                                                                                                                                                                                                                                                                                    |
